# Supplementary material
Source: publisher site journal article supplement (https://www.dovepress.com/article/102646)
Supplement: Supplementary file 1 [file get_supplementary_file.php]

Supplementary Appendix

Figure 1

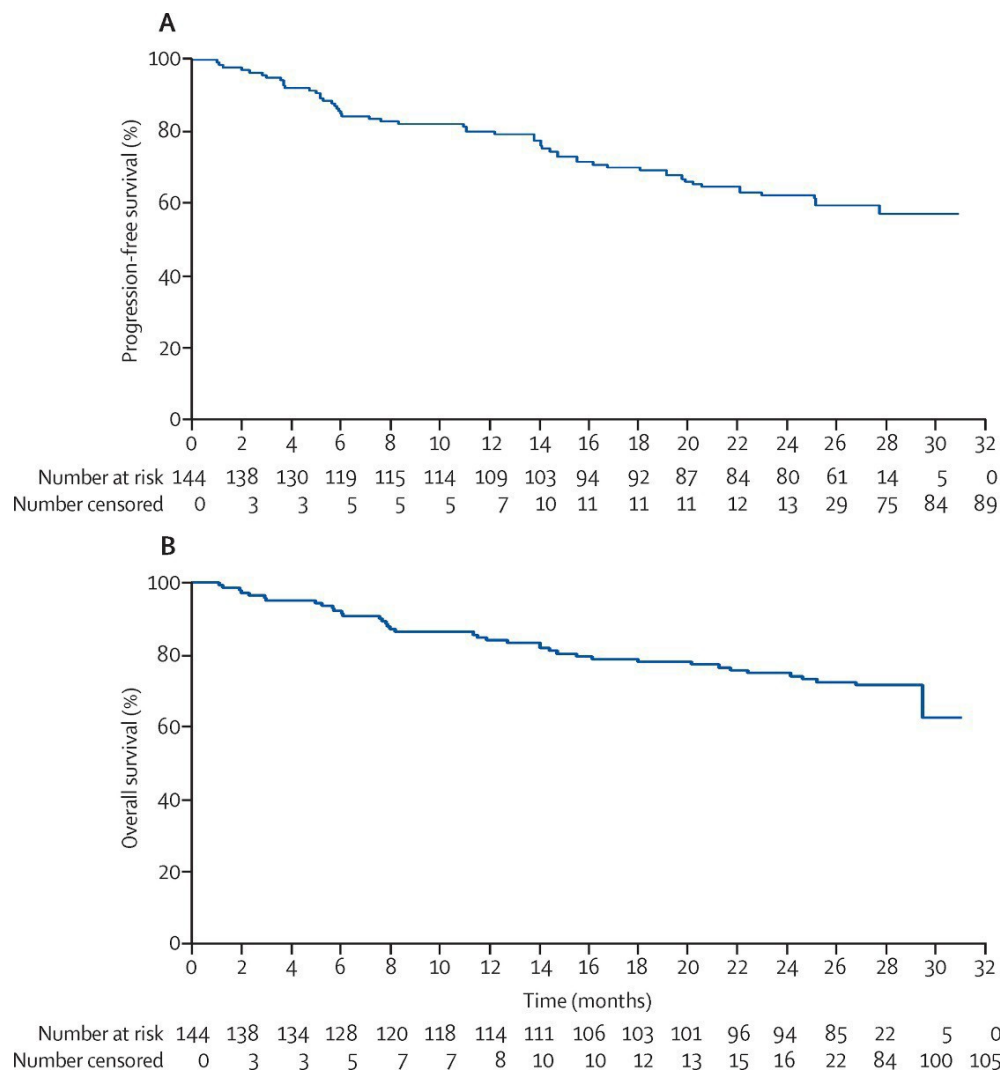

Figure 1: Progression-free survival (A) and overall survival (B) in patients with 17p deletion chronic lymphocytic leukaemia treated with ibrutinib

Note: Reprinted from *Lancet Oncol*, 15, O'Brien S, Furman RR, Coutre SE, et al, Ibrutinib as initial therapy for elderly patients with chronic lymphocytic leukaemia or small lymphocytic lymphoma: an open-label, multicentre, phase 1B/2 trial, 48–58, copyright 2014, with permission from Elsevier.<sup>19</sup>

Figure 2

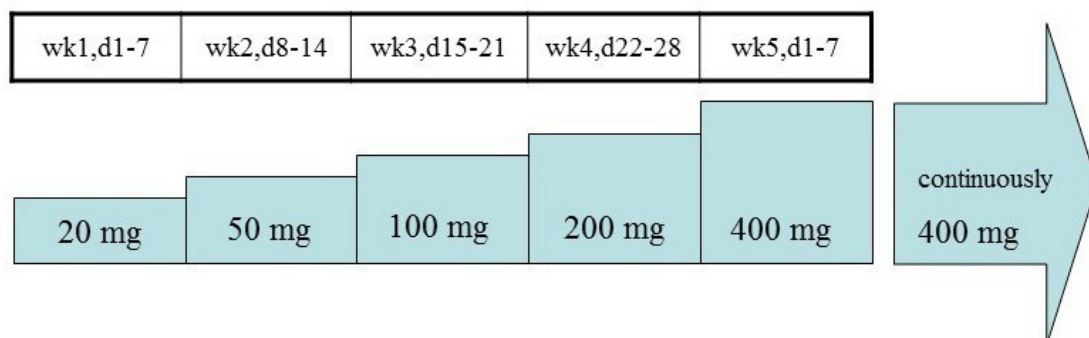

Figure 2: Dose escalation of venetoclax over five weeks as given in the phase 2 trial protocol and in the phase 1 expansion cohort. This ramp-up scheme is still used in CLL current trials while dosing venetoclax.

Table 1: Baseline characteristics of the patients in the phase 1 trial

| Characteristics                                                               | Dose-Escalation Cohort (n = 56) | Expansion Cohort (n = 60) | All patients (N=116)     |
|-------------------------------------------------------------------------------|---------------------------------|---------------------------|--------------------------|
| <b>Age</b>                                                                    |                                 |                           |                          |
| <b>median (range)- yr</b>                                                     | 67 (36-86)                      | 66 (42-84)                | 66 (36-86)               |
| <b>&gt; 70yr – number (%)</b>                                                 | 20 (36)                         | 14 (23)                   | 34 (29)                  |
| <b>Sex – no. (%)</b>                                                          |                                 |                           |                          |
| <b>Male</b>                                                                   | 41 (73)                         | 48 (80)                   | 89 (70)                  |
| <b>Female</b>                                                                 | 15 (27)                         | 12 (20)                   | 27 (23)                  |
| <b>Diagnosis – no. (%)</b>                                                    |                                 |                           |                          |
| <b>CLL</b>                                                                    | 49 (88)                         | 53 (88)                   | 102 (88)                 |
| <b>SLL</b>                                                                    | 7 (12)                          | 7 (12)                    | 14 (12)                  |
| <b>Rai Stage III or IV – no (%)</b>                                           | 28 (50)                         | 39 (65)                   | 67 (58)                  |
| <b>Median no of previous therapies (range)<sup>X</sup></b>                    | 4 (1-10)                        | 3 (1-11)                  | 3 (1-11)                 |
| <b>Resistance to most recent therapy – no. (%)<sup>XX</sup></b>               | 23 (41)                         | 22 (37)                   | 45 (39)                  |
| <b>Previous fludarabine-based therapy – no (%)</b>                            |                                 |                           |                          |
| <b>Any previous fludarabine</b>                                               | 51 (91)                         | 49 (82)                   | 100 (86)                 |
| <b>Resistance to fludarabine</b>                                              | 28 (50)                         | 42 (70)                   | 70 (60)                  |
| <b>ECOG<sup>**</sup> Performance Status – no. (%)</b>                         |                                 |                           |                          |
| <b>Grade 0</b>                                                                | 29 (52)                         | 27 (45)                   | 56 (48)                  |
| <b>Grade 1</b>                                                                | 27 (48)                         | 31 (52)                   | 58 (50)                  |
| <b>Missing Data</b>                                                           | 0                               | 2 (3)                     | 2 (2)                    |
| <b>Peripheral-Blood Lymphocytosis</b>                                         |                                 |                           |                          |
| <b>Absolute Lym count &gt; 5000 per mm<sup>3</sup> - no. (%)</b>              | 31 (55)                         | 35 (58)                   | 66 (57)                  |
| <b>Median count per mm<sup>3</sup> (range)</b>                                | 27,000 (5,400 – 204,500)        | 25,100 (5,200 – 259,000)  | 27,500 (5,200 – 259,000) |
| <b>Bulky nodes – o. (%)</b>                                                   |                                 |                           |                          |
| <b>&gt; 5 cm</b>                                                              | 29 (52)                         | 38 (63)                   | 67 (58)                  |
| <b>&gt; 10 cm</b>                                                             | 10 (18)                         | 12 (20)                   | 22 (19)                  |
| <b>Interphase cytogenetic abnormality – no/total no. with CLL<sup>*</sup></b> |                                 |                           |                          |
| <b>chromosome 17p deletion</b>                                                | 19/49 (39)                      | 12/53 (23)                | 31/102 (30)              |
| <b>chromosome 11q deletion</b>                                                | 13/49 (27)                      | 15/53 (28)                | 28/102 (27)              |
| <b>no chr 17p/11q deletion</b>                                                | 16/49 (33)                      | 27/53 (51)                | 43/102 (42)              |
| <b>data missing or intermediate</b>                                           | 7/49 (14)                       | 3/53 (6)                  | 10/102 (10)              |
| <b>IGHV<sup>**</sup> mutation status – no./total no. with CLL (%)</b>         |                                 |                           |                          |
| <b>unmutated</b>                                                              | 26/49 (53)                      | 20/53 (38)                | 46/102 (45)              |
| <b>mutated</b>                                                                | 6/49 (12)                       | 11/53 (21)                | 17/102 (17)              |
| <b>data missing</b>                                                           | 17/49 (35)                      | 22/53 (42)                | 39/102 (38)              |

<sup>X</sup> A total of 116 patients (100%) received anti-CD20 antibodies, 110 (95%) received alkylating agents, and 103 (89%) received purine analogues.

<sup>XX</sup> Resistance was defined as either a lack of at least a partial response or disease progression while receiving therapy or within 6 months after the completion of therapy. Nineteen patients with resistance to fludarabine were also resistant to the combination of fludarabine, cyclophosphamide, and rituximab.

<sup>\*</sup> A total of 11 patients — 7 in the dose-escalation cohort and 4 in the expansion cohort — had both chromosome 17p and chromosome 11q deletions.

<sup>\*\*</sup> ECOG denotes Eastern Cooperative Oncology Group, and IGHV immunoglobulin heavy-chain variable region.

Note: From *N Engl J Med*, Roberts AW, Davids MS, Pagel JM, et al, Targeting BCL2 with venetoclax in relapsed chronic lymphocytic leukemia, 374, 311–322, Copyright ©2016 Massachusetts Medical Society. Reprinted with permission from Massachusetts Medical Society.<sup>48</sup>

Table 2: Baseline characteristics of the patients in the pivotal phase 2 trial<sup>52</sup>

|                                            | Venetoclax ( n = 107) |
|--------------------------------------------|-----------------------|
| <b>Age (years)</b>                         | 67 (37 – 85)          |
| > 65 years                                 | 61 (57%)              |
| < 65 years                                 | 46 (43%)              |
| <b>Sex</b>                                 |                       |
| Female                                     | 37 (35%)              |
| Male                                       | 70 (65%)              |
| <b>Previous treatments*</b>                |                       |
| Median number of previous treatments       | 2 (1-4)               |
| Bendamustine                               | 54 (50%)              |
| Bendamustine refractory                    | 38 (70%)              |
| Fludarabine                                | 78 (73%)              |
| Fludarabine refractory                     | 34 (44%)              |
| Bendamustine or fludarabine refractory     | 62 (58%)              |
| Idelalisib                                 | 1 (1%)                |
| Ibrutinib                                  | 3 (3%)                |
| Other B-cell receptor inhibitors           | 1 (1%)                |
| <b>ECOG performance status</b>             |                       |
| 0                                          | 42 (39%)              |
| 1                                          | 56 (52%)              |
| 2                                          | 9 (8%)                |
| <b>Rai stage at study entry</b>            |                       |
| Stage III                                  | 19 (18%)              |
| Stage IV                                   | 32 (30%)              |
| Other                                      | 56 (52%)              |
| <b>Binet stage at study entry</b>          |                       |
| Binet A-B                                  | 65 (61%)              |
| Binet C                                    | 42 (39%)              |
| <b>Disease-related complications</b>       |                       |
| Neutropenia                                | 24 (22%)              |
| Anemia                                     | 22 (21%)              |
| Thrombocytopenia                           | 16 (15%)              |
| <b>Absolute lymphocyte count</b>           |                       |
| > 25x10 <sup>9</sup> cell per L            | 54 (51%)              |
| < 25x10 <sup>9</sup> cell per L            | 53 (50%)              |
| Median (x10 <sup>9</sup> )                 | 25.8 (7.9 – 89.9)     |
| <b>Bulky disease</b>                       |                       |
| One or more nodes > 5cm                    | 57 (53%)              |
| No nodes > 5cm                             | 50 (47%)              |
| <b>Tumor lysis syndrome risk category†</b> |                       |
| Low                                        | 19 (18%)              |
| Medium                                     | 43 (40%)              |
| High                                       | 45 (42%)              |
| <b>TP53 mutation‡</b>                      |                       |
| Yes                                        | 60 (72%)              |

|                                                 |          |
|-------------------------------------------------|----------|
| No                                              | 17 (21%) |
| Intermediate                                    | 6 (7%)   |
| Missing                                         | 24 (22%) |
| <b>IGHV mutation</b>                            |          |
| Yes                                             | 7 (19%)  |
| No                                              | 30 (81%) |
| Missing                                         | 70 (65%) |
| <b>Serum <math>\beta</math>-2 microglobulin</b> |          |
| < 3mg/L                                         | 4 (24%)  |
| > 3mg/L                                         | 13 (77%) |
| Missing                                         | 90 (84%) |
| <b>11q deletion</b>                             |          |
| Deleted                                         | 30 (28%) |
| Not deleted                                     | 77 (72%) |

Reprinted from *Lancet Oncol*, 17, Stilgenbauer S, Eichhorst B, Schetelig J, et al, Venetoclax in relapsed or refractory chronic lymphocytic leukaemia with 17p deletion: a multicentre, open-label, phase 2 study, 768–778, copyright (2016), with permission from Elsevier.<sup>52</sup> Data are n (%) or median (IQR) unless otherwise noted. Percentages might not add up to 100% because of rounding. ECOG=Eastern Cooperative Oncology Group. \*Refractory status was defined as no response or disease progression within 6 months of treatment; ten patients were refractory to both fludarabine and bendamustine. †Description of tumour lysis syndrome risk categories in appendix. ‡Investigator reported.

Table 3: A choice of current clinical combination trials in CLL.

| Drugs                                    | Indication CLL                   | Phase | Status     | Location       | Identifier             | Sponsor                |
|------------------------------------------|----------------------------------|-------|------------|----------------|------------------------|------------------------|
| Venetoclax + rituximab                   | r/r                              | I     | ongoing    | USA, Australia | NCT01682616            | AbbVie                 |
| Venetoclax + obinutuzumab                | 1 <sup>st</sup> line, CIRS>6     | III   | ongoing    | Multinational  | NCT02242942 (CLL14)    | Roche/Genentech        |
| Venetoclax + ibrutinib                   | r/r or 1 <sup>st</sup> line 17p- | II    | recruiting | USA (Texas)    | NCT02756897            | AbbVie                 |
| Bendamustine → venetoclax + obinutuzumab | 1 <sup>st</sup> line or r/r      | II    | ongoing    | Germany        | NCT02401503 (CLL2BAG)  | German CLL Study Group |
| Venetoclax + ibrutinib + obinutuzumab    | 1 <sup>st</sup> line or r/r      | Ib/II | recruiting | USA            | NCT02427451            | Jeffrey Jones          |
| Venetoclax + ibrutinib + obinutuzumab    | 1 <sup>st</sup> line, 17p-       | II    | recruiting | Germany        | NCT02758665 (CLL2GIVe) | German CLL Study Group |

Table 4: A choice of current clinical combination trials of hematologic malignancies and solid tumors.

| Drugs                                   | Indication    | Phase | Status     | Location               | Identifier          | Sponsor                    |
|-----------------------------------------|---------------|-------|------------|------------------------|---------------------|----------------------------|
| Venetoclax + decitabine or azacytidine  | AML           | I     | recruiting | multinational          | NCT02203773         | AbbVie                     |
| Venetoclax + ibrutinib + obinutuzumab   | MCL           | I/II  | recruiting | France/UK              | NCT02558816 (OAsIs) | Nantes University Hospital |
| Venetoclax + bortezomib + dexamethasone | MM            | I     | recruiting | USA, France, Australia | NCT01794507         | AbbVie                     |
| Venetoclax + tamoxifen                  | Breast cancer | I     |            | Australia              | ISRCTN98335443      | AbbVie                     |
